# Supplementary material
Source: PubMed Central journal article supplement (PMC6269303)
Supplement: 2018_190587-Disclosures_and_Contributions.pdf [file 2018_190587-Disclosures_and_Contributions.pdf]

Haematologica  
HAEMATOL/2018/190587  
Version 2

A comprehensive inventory of TLX1 controlled long non-coding RNAs  
in T-cell acute lymphoblastic leukemia through polyA+ and total RNA  
sequencing

Karen Verboom, Wouter Van Loocke, Pieter-Jan Volders, Bieke  
Decaesteker, Francisco Avila Cobos, Simon Bornschein, Charles E. de  
Bock, Zeynep Kalender Atak, Emmanuelle Clappier, Stein Aerts, Jan  
Cools, Jean Soulier, Tom Taghon, Pieter Van Vlierberghe, Jo  
Vandesompele, Frank Speleman, and Kaat Durinck

Disclosures: none

Contributions: Karen Verboom performed laboratory experiments and data analysis, was involved in the design of the experiments, coordination of the research, generation of the figures and writing of the manuscript. Wouter Van Loocke assisted with the data analysis of RNA sequencing, ChIP sequencing and ATAC sequencing. Pieter-Jan Volders assisted with the data analysis. Bieke Decaesteker assisted with the ChIP sequencing experiments and data analysis. Francisco Avila Cobos assisted with the ATAC-seq data analysis. Simon Bornschein, Charles E de Bock, Zeynep Kalender Atak, Stein Aerts and Jan Cools assisted with the ATAC-seq experiment and subsequent data-mining. Jean Soulier and Emmanuelle Clappier collected the primary T-All samples. Tom Taghon collected and analyzed the normal thymocyte samples, designed experiments and coordinated the research. Pieter Van Vlierberghe coordinated the research, designed experiments and helped writing the paper. Jo Vandesompele coordinated the research, designed experiments and helped writing the paper. Frank Speleman coordinated the research, designed experiments and helped writing the paper. Kaat Durinck coordinated the laboratory experiments, was involved in the design of the experiments and coordination of the research and wrote the paper.
